# Supplementary material for: Entomological Surveys in Rural Tanzania Reveal Key Opportunities for Targeted Larval Source Management to Control Malaria in Areas Dominated by Anopheles funestus
Source: Research Square preprint supplement (doi:10.21203/rs.3.rs-4766992/v1), 2024-08-05
Supplement: Supplementary file 1 [file 205d2b7934118d7079a87575.docx]

**Table 1.** Analysis ofmalaria vectors, transmission indices, and contribution of different vector species to EIR in the study area.

| Parameter | Trap & trap positions | *An. funestus* | *An. arabiensis* | Other *Anopheles* |
| --- | --- | --- | --- | --- |
| Total Trap nights | CDC light traps (Indoors) | 4,464 | 4,464 | 4,464 |
| DN-mini traps (Outdoors) | 1,422 | 1,422 | 1,422 |
| Number caught | CDC light traps (Indoors) | 15,343 | 2,771 | 84 |
| DN-mini traps (Outdoors) | 1,527 | 891 | 12 |
| No. tested pools | CDC light traps (Indoors) | 1,134 | 3,632 | 70 |
| DN-mini traps (Outdoors) | 446 | 716 | 8 |
| No. pools with *P. falciparum* sporozoites | CDC light traps (Indoors) | 240 | 6 | 0 |
| DN-mini traps (Outdoors) | 24 | 1 | 0 |
| Minimum prevalence of *P. falciparum* | CDC light traps (Indoors) | 1.5% | 0.2% | 0 |
| DN-mini traps (Outdoors) | 1.5% | 0.1% | 0 |
| Annual entomological inoculation rate (EIR) | Indoors (based on CDC-light traps data) | 19.6 | 0.5 | 0 |
| Outdoors (based on DN-Mini data) | 6.2 | 0.3 | 0 |
| Overall EIR | Indoors (based on CDC-light traps data) | 20.1 | | |
| Outdoors (based on DN-Mini data) | 6.5 | | |
| Percentage contribution of species to EIR | Indoors (based on CDC-light traps data) | 97.6% | 2.4% | 0% |
| Outdoors (based on DN-Mini data) | 95.4% | 4.6% | 0% |
