# Supplementary material for: Entomological Surveys in Rural Tanzania Reveal Key Opportunities for Targeted Larval Source Management to Control Malaria in Areas Dominated by Anopheles funestus
Source: Research Square preprint supplement (doi:10.21203/rs.3.rs-4766992/v1), 2024-08-05
Supplement: Supplementary file 2 [file 5f75b7b72623b586526d10e4.docx]

**Table 4.** Comparison of the number and surface area of potential habitats and habitats infested by *An. funestus* and *An. arabiensis* in the four villages surveyed in both dry and rainy seasons. Percentage reductions in both number and area are included.

| **Habitats** | **Habitat category** | **Rainy season** | | **Dry season** | | **Reduction in number of habitats from rainy season to dry season** | **Reduction in surface area of habitats from rainy season to dry season** |
| --- | --- | --- | --- | --- | --- | --- | --- |
| **Total number of habitats, N** | **Total area of habitats found, m2** | **Total number of habitats, N** | **Total area of habitats found, m2** |
| Late instars of *An. funestus* | Ground pools | 16 | 1,075,814.3 | 7 | 62,405.9 | 56.2% | 94.2% |
| Human-made habitats | 19 | 5,964.3 | 9 | 13,942.8 | 52.6% | 133.8%***** |
| Rice fields | 10 | 25,247.6 | 3 | 1,369.9 | 70% | 94.6% |
| River/ stream segments | 195 | 16,862 | 135 | 12,044.6 | 30.8% | 28.6% |
| Springs/ wells | 22 | 194.7 | 10 | 103 | 54.5% | 47.1% |
| Other small habitats | 4 | 66.6 | 1 | 0.7 | 75% | 98.9% |
| **Overall** | | 266 | 1,124,149.5 | 165 | 89,866.9 | 38% | 92% |
| Late instars of *An. arabiensis* | Ground pools | 12 | 1,086,758.3 | 3 | 3,916.4 | 75% | 99.6% |
| Human-made habitats | 14 | 5,913.9 | 1 | 3.9 | 92.9% | 99.9% |
| Rice fields | 18 | 50,745 | 2 | 20,211.3 | 88.9% | 60.2% |
| River/ stream segments | 22 | 4,011.9 | 37 | 4,399.5 | 68.2%***** | 9.7%***** |
| Springs/ wells | 49 | 383.6 | 2 | 13.1 | 95.9% | 96.6% |
| Other small habitats | 2 | 358.7 | 5 | 82.1 | 150%***** | 77.1% |
| **Overall** | | 117 | 1,148,171.4 | 50 | 28,626.3 | 57.3% | 97.5% |
| All potential habitat | Ground pools | 44 | 1,158,902.1 | 35 | 202,464.9 | 20.5% | 82.5% |
| Human-made habitats | 110 | 24,792.9 | 54 | 15,422.3 | 50.9% | 37.8% |
| Rice fields | 79 | 350,810.5 | 19 | 68,495 | 75.9% | 80.5% |
| River/ stream segments | 813 | 91,851.8 | 554 | 64,257.4 | 31.9% | 30% |
| Springs/ wells | 201 | 8,595.8 | 176 | 706.8 | 12.4% | 91.8% |
| Other small habitats | 32 | 558.6 | 22 | 360.3 | 31.2% | 35.5% |
| **Overall** | | 1279 | 1,635,511.7 | 860 | 351,706.7 | 32.8% | 78.5% |

**+** Indicates an increase in the proportion of the number or surface area in the dry season compared to the rainy season.
