# Supplementary material for: Entomological Surveys in Rural Tanzania Reveal Key Opportunities for Targeted Larval Source Management to Control Malaria in Areas Dominated by Anopheles funestus
Source: Research Square preprint supplement (doi:10.21203/rs.3.rs-4766992/v1), 2024-08-05
Supplement: Supplementary file 3 [file 6bfbd70643578e4b021dae76.docx]

**Table 2.** Water bodies (potential mosquito aquatic habitats) found in the study villages.

| **Season** | **Habitat category** | **Total number of habitats, N (%)** | **Total area of habitats, m2 (%)** | **Median No. habitats/village, m2 (range)** | **Median area of habitats/village, m2 (range)** |
| --- | --- | --- | --- | --- | --- |
| **Rainy season** | Ground pools | 48 (2.5%) | 1,160,763 (68.3%) | 9 (0-25) | 12,598 (0-988,309) |
| Human-made habitats | 225 (11.7%) | 28,378 (1.7%) | 28 (19-115) | 3,585 (1,108-16,903) |
| Rice fields | 103 (5.4%) | 370,740 (21.8%) | 22 (0-42) | 27,123 (0-175,335) |
| River/ stream segments | 1,104 (57.4%) | 125,169 (7.4%) | 192 (150-300) | 21,236 (17,122-35,847) |
| Springs/ wells | 351 (18.3%) | 9,128 (0.5%) | 54 (6-150) | 275 (12-8,186) |
| Other small habitats | 92 (4.8%) | 4,264 (0.3%) | 5 (4-60) | 62 (58-3,705) |
| **Subtotal*** | 1,923 (100%) | 1,698,441 (100%) | 342 (204-644) | 62,930 (19,913-1,197,974) |
| **Dry season** | Ground pools | 74 (4.8%) | 646,362 (72.8%) | 15 (0-22) | 17,828 (0-426,003) |
| Human-made habitats | 67 (4.4%) | 15,682 (1.8%) | 9 (2-25) | 260 (11-7,594) |
| Rice fields | 26 (1.7%) | 87,926 (9.9%) | 5 (0-9) | 2,066 (0-61,305) |
| River/ stream segments | 910 (59.6%) | 135,407 (15.3%) | 135 (28-194) | 11,028 (2,548-59,918) |
| Springs/ wells | 401 (26.2%) | 1,349 (0.2%) | 65 (5-100) | 191 (9-374) |
| Other small habitats | 50 (3.3%) | 936 (0.1%) | 5 (1-16) | 89 (1-322) |
| **Subtotal*** | 1,528 (100%) | 887,662 (100%) | 238 (103-331) | 46,525 (3,068-486,362) |

*****Numbers and areas of habitats were calculated from a different number of villages in rainy (5 villages: Chikuti, Chirombola, Ebuyu, Kichangani, and Mzelezi) and dry (7 villages: Chirombola, Ebuyu, Iragua, Kichangani, Kidugalo, and Mwaya and Mzelezi) seasons.
