# Supplementary material for: Entomological Surveys in Rural Tanzania Reveal Key Opportunities for Targeted Larval Source Management to Control Malaria in Areas Dominated by Anopheles funestus
Source: Research Square preprint supplement (doi:10.21203/rs.3.rs-4766992/v1), 2024-08-05
Supplement: Supplementary file 4 [file 96e528bd1fd31ab6675af9b5.docx]

**Table 3.** Number and area of aquatic habitats infested by different immature stages of different Anopheles in the rainy and dry seasons.

| **Season** | **Habitat types** | **Total number of potential habitats** | **No. habitats with Anopheles immatures, (% contribution)** | **Proportion of habitats infested by habitat category** | **Median No. habitats with Anopheles immatures per village (range)** | **Total area of potential habitats** | **Total area (m2) of habitats with Anopheles immatures, (% contribution)** | **Proportion of area infested by habitat category** | **Median area (m2) of habitats infested with Anopheles immatures per village (range)** |
| --- | --- | --- | --- | --- | --- | --- | --- | --- | --- |
| **Any *Anopheles*** | | | | | | | | | |
| **Rainy season** | Ground pools | 48 (2.5%) | 27 (3.8%) | 56.2% | 7 (0-10) | 1,160,762 (68.3%) | 1,099,282 (88.3%) | 94.7% | 1,113 (0 (-988,309) |
| Human-made habitats | 225 (11.7%) | 88 (12.2%) | 39.1% | 11 (8-45) | 28,378 (1.7%) | 14,430 (1.2%) | 50.8% | 1,182 (313 (-10,232) |
| Rice fields | 103 (5.4%) | 45 (6.3%) | 43.7% | 9 (0-23) | 370,741 (21.8%) | 98,407 (7.9%) | 26.5% | 9,628 (0 (-48,699) |
| River/ stream segments | 1,104 (57.4%) | 341 (47.4%) | 30.9% | 38 (5-205) | 125,169 (7.4%) | 30,246 (2.4%) | 24.2% | 4,903 (450 (-16,026) |
| Springs/ wells | 351 (18.3%) | 186 (25.9%) | 53.0% | 25 (1-96) | 9,128 (0.5%) | 804 (0.1%) | 8.8% | 106 (1 (-401) |
| Other small habitats | 92 (4.8%) | 32 (4.5%) | 34.8% | 3 (1-22) | 4,264 (0.3%) | 1,387 (0.1%) | 32.5% | 53 (4 (-951) |
| **Subtotal*** | 1,923 (100%) | 719 (100%) | 37.4% | 66.5 (27-341) | 1,698,441 (100%) | 1,244,555 (100%) | 73.3% | 22,338 (804-1,099,282) |
| **Dry season** | Ground pools | 74 (4.8%) | 41 (8.6%) | 55.4% | 7 (0-13) | 646,363 (72.8%) | 576,249 (87.6%) | 89.2% | 17,549 (0 (-392,015) |
| Human-made habitats | 67 (4.4%) | 32 (6.7%) | 47.8% | 5 (0-9) | 15,680 (1.8%) | 14,884 (2.3%) | 94.9% | 193 (0 (-7,519) |
| Rice fields | 26 (1.7%) | 7 (1.5%) | 26.9% | 0 (0-3) | 87,926 (9.9%) | 32,530 (4.9%) | 37% | 0 (0 (-27,273) |
| River/ stream segments | 910 (59.6%) | 334 (70.3%) | 36.7% | 39 (21-91) | 135,408 (15.3%) | 33,468 (5.1%) | 24.7% | 4,623 (2,234 (-6,733) |
| Springs/ wells | 401 (26.2%) | 43 (9.1%) | 10.7% | 8 (1-10) | 1,350 (0.2%) | 214 (0%) | 15.9% | 30 (2 (-80) |
| Other small habitats | 50 (3.3%) | 18 (3.8%) | 36.0% | 1 (0-7) | 936 (0.1%) | 495 (0.1%) | 52.9% | 33 (0 (-191) |
| **Subtotal*** | 1,528 (100%) | 475 (100%) | 31.1% | 36.5 (7-334) | 887,662 (100%) | 657,841 (100%) | 74.1% | 23,707 (214-576,249) |
| **Late instars of *An. funestus*** | | | | | | | | | |
| **Rainy season** | Ground pools | 48 (2.5%) | 17 (5.4%) | 35.4% | 4 (0-7) | 1,160,762 (68.3%) | 1,075,964 (95.5%) | 92.7% | 1,052 (0 (-965,258) |
| Human-made habitats | 225 (11.7%) | 35 (11.0%) | 15.6% | 5 (4-16) | 28,378 (1.7%) | 6,664 (0.6%) | 23.5% | 700 (190 (-4,555) |
| Rice fields | 103 (5.4%) | 12 (3.8%) | 11.7% | 2 (0-5) | 370,741 (21.8%) | 25,637 (2.3%) | 6.9% | 1,648 (0 (-14,310) |
| River/ stream segments | 1,104 (57.4%) | 209 (65.9%) | 18.9% | 16 (5-146) | 125,169 (7.4%) | 17,954 (1.6%) | 14.3% | 1,584 (450 (-12,628) |
| Springs/ wells | 351 (18.3%) | 38 (12.0%) | 10.8% | 7 (1-16) | 9,128 (0.5%) | 225 (0%) | 2.5% | 30 (1 (-89) |
| Other small habitats | 92 (4.8%) | 6 (1.9%) | 6.5% | 1 (0-2) | 4,264 (0.3%) | 625 (0.1%) | 14.7% | 16 (0 (-558) |
| **Subtotal*** | 1,923 (100%) | 317 (100%) | 16.5% | 26 (6-209) | 1,698,442 (100%) | 1,127,069 (100%) | 66.4% | 12,309 (225-1,075,964) |
| **Dry season** | Ground pools | 74 (4.8%) | 20 (8.6%) | 27.0% | 3 (0-7) | 646,363 (72.8%) | 325,325 (90.2%) | 50.3% | 4,618 (0 (-245,934) |
| Human-made habitats | 67 (4.4%) | 10 (4.3%) | 14.9% | 1 (0-5) | 15,680 (1.8%) | 13,995 (3.9%) | 89.3% | 52 (0 (-7,503) |
| Rice fields | 26 (1.7%) | 3 (1.3%) | 11.5% | 0 (0-2) | 87,926 (9.9%) | 1,370 (0.4%) | 1.6% | 0 (0 (-1,272) |
| River/ stream segments | 910 (59.6%) | 188 (80.7%) | 20.7% | 19 (6-79) | 135,408 (15.3%) | 19,803 (5.5%) | 14.6% | 1,924 (1,147 (-6,132) |
| Springs/ wells | 401 (26.2%) | 11 (4.7%) | 2.7% | 3 (1-4) | 1,350 (0.2%) | 104 (0%) | 7.7% | 22 (1 (-58) |
| Other small habitats | 50 (3.3%) | 1 (0.4%) | 2.0% | 0 (0-1) | 936 (0.1%) | 1 (0%) | 0.1% | 0 (0 (-1) |
| **Subtotal*** | 1,528 (100%) | 233 (100%) | 15.2% | 10.5 (1-188) | 887,662 (100%) | 360,597 (100%) | 40.6% | 7,683 (1-325,325) |
| **Late instars of *An. arabiensis*** | | | | | | | | | |
| **Rainy season** | Ground pools | 48 (2.5%) | 12 (5.6%) | 25.0% | 1 (0-8) | 1,160,762 (68.3%) | 1,086,758 (93.8%) | 93.6% | 100 (0 (-977,509) |
| Human-made habitats | 225 (11.7%) | 26 (12.1%) | 11.6% | 5 (0-12) | 28,378 (1.7%) | 6,537 (0.6%) | 23.0% | 321 (0 (-5,435) |
| Rice fields | 103 (5.4%) | 23 (10.7%) | 22.3% | 1 (0-17) | 370,741 (21.8%) | 55,814 (4.8%) | 15.1% | 5,068 (0 (-30,745) |
| River/ stream segments | 1,104 (57.4%) | 42 (19.5%) | 3.8% | 8 (0-20) | 125,169 (7.4%) | 8,062 (0.7%) | 6.4% | 1,139 (0 (-4,050) |
| Springs/ wells | 351 (18.3%) | 97 (45.1%) | 27.6% | 24 (1-48) | 9,128 (0.5%) | 518 (0%) | 5.7% | 87 (22 (-322) |
| Other small habitats | 92 (4.8%) | 15 (7.0%) | 16.3% | 0 (0-13) | 4,264 (0.3%) | 886 (0.1%) | 20.8% | 0 (0 (-527) |
| **Subtotal*** | 1,923 (100%) | 215 (100%) | 11.2% | 24.5 (12-97) | 1,698,442 (100%) | 1,158,574 (100%) | 68.2% | 7,299 (518-1,086,758) |
| **Dry season** | Ground pools | 74 (4.8%) | 15 (10.1%) | 20.3% | 0 (0-7) | 646,363 (72.8%) | 268,374 (89.1%) | 41.5% | 0 (0 (-247,540) |
| Human-made habitats | 67 (4.4%) | 6 (4.1%) | 9.0% | 0 (0-3) | 15,680 (1.8%) | 151 (0.1%) | 1.0% | 0 (0 (-126) |
| Rice fields | 26 (1.7%) | 2 (1.4%) | 7.7% | 0 (0-1) | 87,926 (9.9%) | 20,211 (6.7%) | 23.0% | 0 (0 (-16,324) |
| River/ stream segments | 910 (59.6%) | 100 (67.6%) | 11.0% | 11 (1-40) | 135,407 (15.3%) | 12,048 (4.0%) | 8.9% | 1,234 (118 (-3,865) |
| Springs/ wells | 401 (26.2%) | 12 (8.1%) | 3.0% | 1 (1-5) | 1,350 (0.2%) | 56 (0%) | 4.2% | 12 (0 (-30) |
| Other small habitats | 50 (3.3%) | 13 (8.8%) | 26.0% | 1 (0-4) | 936 (0.1%) | 408 (0.1%) | 43.6% | 33 (0 (-191) |
| **Subtotal*** | 1,528 (100%) | 148 (100%) | 9.7% | 12.5 (2-100) | 887,662 (100%) | 301,248 (100%) | 33.9% | 6,228 (56-268,374) |

*****Numbers and areas of habitats were calculated from a different number of villages in rainy (5 villages: Chikuti, Chirombola, Ebuyu, Kichangani, and Mzelezi) and dry (7 villages: Chirombola, Ebuyu, Iragua, Kichangani, Kidugalo, and Mwaya and Mzelezi) seasons.
