# Supplementary material for: Entomological Surveys in Rural Tanzania Reveal Key Opportunities for Targeted Larval Source Management to Control Malaria in Areas Dominated by Anopheles funestus
Source: Research Square preprint supplement (doi:10.21203/rs.3.rs-4766992/v1), 2024-08-05
Supplement: Supplementary file 5 [file db98d0d6af36ac33083dca54.docx]

**Table 5.** Characteristics of different aquatic habitat types found with late instars of *An. funestus* and *An. arabiensis* in the rainy and dry season.

| **Season** | **Habitat characteristics** | **All water bodies n (%)** | **No. habitats with late instars of *An. funestus* (%)** | **No. habitats with late instars of *An. arabiensis* (%)** | ***An. funestus*** | | ***An. arabiensis*** | |
| --- | --- | --- | --- | --- | --- | --- | --- | --- |
| **Odds ratio (95%CI)** | **p-value** | **Odds ratio (95%CI)** | **p-value** |
| **Rainy season** | **Water movement** | | | | | | | |
| Stagnant | 807 (42%) | 102 (32.4%) | 170 (79.1%) | 1 |  | 1 |  |
| Flowing | 1113 (58%) | 213 (67.6%) | 45 (20.9%) | 1.1(0.8-1.4) | 0.70 | 0.2 (0.1-0.2) | <0.01 |
| **Presence of emergent or floating vegetations** | | | | | | | |
| Absent | 1182 (61.6%) | 166 (52.7%) | 110 (51.2%) | 1 |  | 1 |  |
| Present | 738 (38.4%) | 149 (47.3%) | 105 (48.8%) | 1.4 (1.1-1.8) | 0.01 | 1.3 (1.0-1.8) | 0.06 |
| **Water clarity** | | | | | | | |
| Opaque | 379 (19.7%) | 30 (9.5%) | 49 (22.8%) | 1 |  | 1 |  |
| Clear | 1541 (80.3%) | 285 (90.5%) | 166 (77.2%) | 2.4 (1.6-3.7) | <0.01 | 1.8 (1.2-2.6) | <0.01 |
| **Presence of green algae** | | | | | | | |
| Absent | 1738 (90.5%) | 251 (79.7%) | 188 (87.4%) | 1 |  | 1 |  |
| Present | 182 (9.5%) | 64 (20.3%) | 27 (12.6%) | 2.8 (2.0-4) | <0.01 | 1.5 (0.9-2.4) | 0.09 |
| **Habitat shading** | | | | | | | |
| None | 1217 (63.4%) | 202 (64.1%) | 176 (81.9%) | 1 |  | 1 |  |
| Shaded | 703 (36.6%) | 113 (35.9%) | 39 (18.1%) | 0.9 (0.7-1.2) | 0.69 | 0.4 (0.3-0.6) | <0.01 |
| **Distance to nearest household** | | | | | | | |
| Greater than 100m | 874 (45.5%) | 157 (49.8%) | 68 (31.6%) | 1 |  | 1 |  |
| Less than 100m | 1046 (54.5%) | 158 (50.2%) | 147 (68.4%) | 0.9 (0.7-1.1) | 0.28 | 1.3 (0.9-1.7) | 0.17 |
| **Habitat size** | | | | | | | |
| Less than 100m2 | 307 (16%) | 24 (7.6%) | 67 (31.2%) | 0.9 (0.7-1.1) | 0.28 | 1 |  |
| Greater than 100m2 | 1613 (84%) | 291 (92.4%) | 148 (68.8%) | 2.1 (1.3-3.4) | <0.01 | NI | - |
| **Dry season** | **Water movement** | | | | | | | |
| Stagnant | 758 (49.6%) | 85 (36.6%) | 65 (43.9%) | NI | - | 1 |  |
| Flowing | 769 (50.4%) | 147 (63.4%) | 83 (56.1%) | NI | - | 1.0 (0.7-1.5) | 0.97 |
| **Presence of emergent or floating vegetations** | | | | | | | |
| Absent | 1150 (75.3%) | 102 (44%) | 84 (56.8%) | 1 |  | 1 |  |
| Present | 377 (24.7%) | 130 (56%) | 64 (43.2%) | 3.3 (2.4-4.5) | <0.01 | 2.0 (1.4-3.0) | <0.01 |
| **Water clarity** | | | | | | | |
| Opaque | 573 (37.5%) | 51 (22%) | 66 (44.6%) | 1 |  | 1 |  |
| Clear | 954 (62.5%) | 181 (78%) | 82 (55.4%) | 2.3 (1.6-3.2) | <0.01 | 0.7 (0.5-1.0) | 0.03 |
| **Presence of green algae** | | | | | | | |
| Absent | 1381 (90.4%) | 187 (80.6%) | 119 (80.4%) | 1 |  | 1 |  |
| Present | 146 (9.6%) | 45 (19.4%) | 29 (19.6%) | 1.9 (1.2-2.9) | <0.01 | 2.0 (1.3-3.3) | <0.01 |
| **Habitat shading** | | | | | | | |
| None | 1014 (66.4%) | 103 (44.4%) | 90 (60.8%) | 1 |  | 1 |  |
| Shaded | 513 (33.6%) | 129 (55.6%) | 58 (39.2%) | 2.3 (1.7-3.1) | <0.01 | 1.1 (0.8-1.6) | 0.56 |
| **Distance to nearest household** | | | | | | | |
| Greater than 100m | 685 (44.9%) | 91 (39.2%) | 64 (43.2%) | 1 |  | 1 |  |
| Less than 100m | 842 (55.1%) | 141 (60.8%) | 84 (56.8%) | 1.5 (1.1-2.1) | <0.01 | 1.2 (0.8-1.7) | 0.32 |
| **Habitat size** | | | | | | | |
| Less than 100m2 | 281 (18.4%) | 5 (2.2%) | 10 (6.8%) | 1 |  | 1 |  |
| Greater than 100m2 | 1246 (81.6%) | 227 (97.8%) | 138 (93.2%) | 8.8 (3.5-21.9) | <0.01 | 2.6 (1.3-5.2) | <0.01 |

NI - Variable not included in the final model
